# Supplementary material for: Fluorescence resonance energy transfer in conjugated polymer composites for radiation detection
Source: Royal Society of Chemistry journal article supplement (doi:10.1039/b801375f), 2008-01-01
Supplement: b801375f.pdf [file b801375f.pdf]

## Electronic Supplementary Information (ESI)

# Conjugated Polymer Composites for Radiation Detection Based on Fluorescence Resonance Energy Transfer

Yong Sheng Zhao, Haizheng Zhong, and Qibing Pei\*

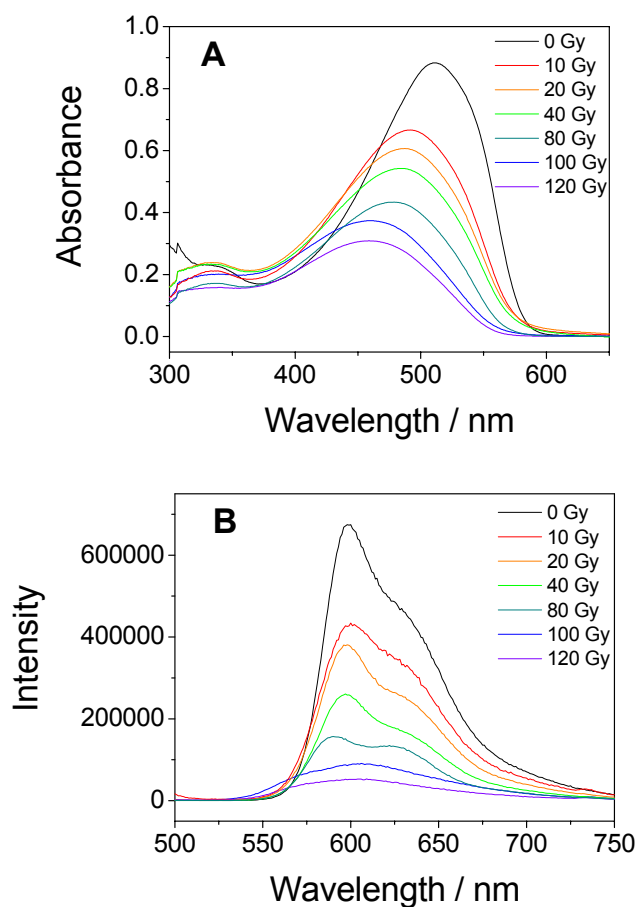

**Figure S1.** Absorption (A) and PL (B) spectra of MEH-PPV/DIB (1:30) composite films before and after  $\gamma$  exposure (0-120 gray)

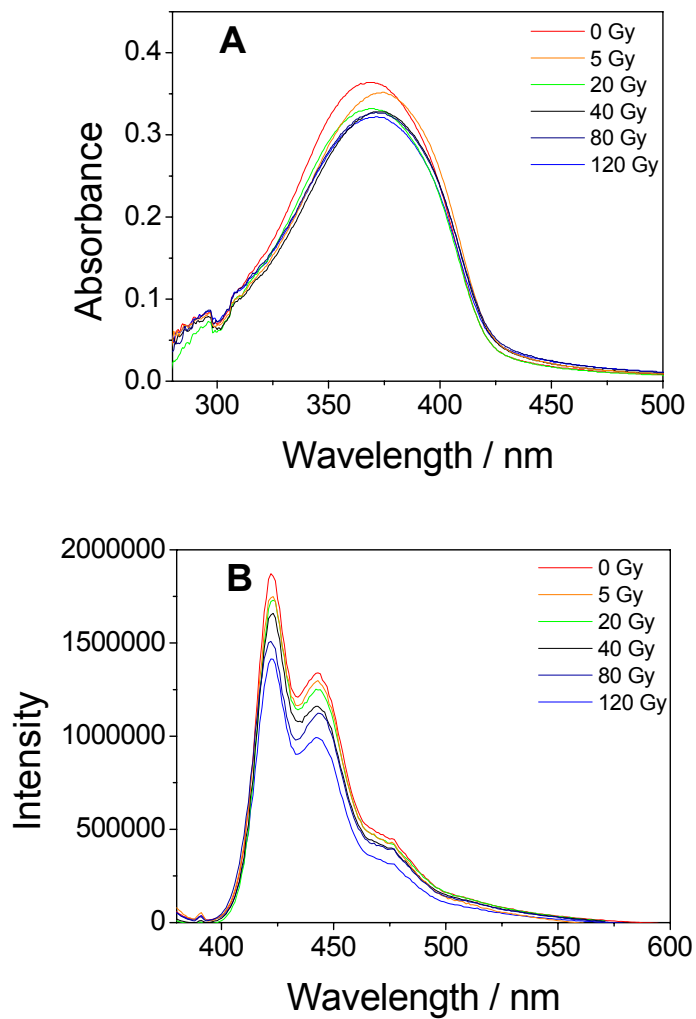

**Figure S2.** Absorption (A) and PL (B) spectra of HEH-PF/DIB (1:10) composite films before and after  $\gamma$  exposure (0-120 gray)
